# Supplementary material for: Long-Lasting, Kin-Directed Female Interactions in a Spatially Structured Wild Boar Social Network
Source: PubMed Central journal article supplement (PMC4053407; doi:10.1371/journal.pone.0099875), 2014-06-11
Supplement: pone.0099875.s001.pdf [file pone.0099875.s001.pdf]

**Table S1. Matrix of relatedness (Queller & Goodnight 1989), association index (HWI) and spatial overlap (VI index) among individuals in two years (2008 and 2009) of the study. Animal IDs (ID\_1 and ID\_2) correspond to the numbers in Figure 1.**

| Year | ID_1 | ID_2 | Relatedness | Association index (HWI) | Spatial overlap (VI index) |
|------|------|------|-------------|-------------------------|----------------------------|
| 2008 | 2    | 4    | 0.411       | 0.04                    | 0.249                      |
| 2008 | 2    | 5    | 0.117       | 0.07                    | 0.237                      |
| 2008 | 2    | 10   | -0.208      | 0.03                    | 0.184                      |
| 2008 | 2    | 11   | -0.171      | 0.01                    | 0.169                      |
| 2008 | 2    | 12   | -0.252      | 0.01                    | 0.171                      |
| 2008 | 2    | 13   | 0.078       | 0.01                    | 0.183                      |
| 2008 | 2    | 14   | -0.045      | 0.02                    | 0.225                      |
| 2008 | 2    | 15   | -0.041      | 0.02                    | 0.210                      |
| 2008 | 2    | 17   | -0.043      | 0.00                    | 0.240                      |
| 2008 | 2    | 18   | 0.120       | 0.00                    | 0.172                      |
| 2008 | 2    | 19   | 0.056       | 0.00                    | 0.140                      |
| 2008 | 2    | 20   | 0.199       | 0.00                    | 0.149                      |
| 2008 | 2    | 21   | 0.062       | 0.00                    | 0.145                      |
| 2008 | 2    | 22   | 0.092       | 0.00                    | 0.139                      |
| 2008 | 2    | 23   | -0.105      | 0.00                    | 0.040                      |
| 2008 | 2    | 24   | -0.147      | 0.00                    | 0.080                      |
| 2008 | 2    | 25   | 0.091       | 0.00                    | 0.081                      |
| 2008 | 2    | 26   | 0.380       | 0.00                    | 0.054                      |
| 2008 | 2    | 27   | -0.046      | 0.05                    | 0.373                      |
| 2008 | 2    | 28   | -0.044      | 0.06                    | 0.326                      |
| 2008 | 2    | 29   | 0.125       | 0.05                    | 0.338                      |
| 2008 | 2    | 30   | 0.103       | 0.04                    | 0.303                      |
| 2008 | 2    | 31   | -0.030      | 0.00                    | 0.372                      |
| 2008 | 2    | 32   | 0.200       | 0.02                    | 0.454                      |
| 2008 | 2    | 33   | 0.198       | 0.00                    | 0.013                      |
| 2008 | 2    | 34   | 0.196       | 0.04                    | 0.410                      |
| 2008 | 2    | 35   | -0.060      | 0.07                    | 0.367                      |
| 2008 | 2    | 36   | -0.001      | 0.00                    | 0.242                      |
| 2008 | 2    | 37   | 0.287       | 0.00                    | 0.242                      |
| 2008 | 2    | 38   | -0.032      | 0.00                    | 0.230                      |
| 2008 | 4    | 5    | 0.053       | 0.78                    | 0.947                      |
| 2008 | 4    | 10   | -0.080      | 0.00                    | 0.002                      |
| 2008 | 4    | 11   | -0.094      | 0.00                    | 0.001                      |
| 2008 | 4    | 12   | -0.225      | 0.00                    | 0.002                      |
| 2008 | 4    | 13   | -0.283      | 0.00                    | 0.003                      |
| 2008 | 4    | 14   | -0.068      | 0.00                    | 0.002                      |
| 2008 | 4    | 15   | -0.181      | 0.00                    | 0.002                      |
| 2008 | 4    | 17   | -0.278      | 0.03                    | 0.145                      |
| 2008 | 4    | 18   | -0.189      | 0.00                    | 0.073                      |
| 2008 | 4    | 19   | -0.042      | 0.00                    | 0.020                      |

|      |   |    |        |      |       |
|------|---|----|--------|------|-------|
| 2008 | 4 | 20 | 0.239  | 0.00 | 0.021 |
| 2008 | 4 | 21 | 0.023  | 0.00 | 0.022 |
| 2008 | 4 | 22 | 0.018  | 0.00 | 0.025 |
| 2008 | 4 | 23 | -0.255 | 0.00 | 0.002 |
| 2008 | 4 | 24 | -0.344 | 0.00 | 0.010 |
| 2008 | 4 | 25 | -0.350 | 0.00 | 0.006 |
| 2008 | 4 | 26 | -0.190 | 0.00 | 0.002 |
| 2008 | 4 | 27 | -0.152 | 0.00 | 0.120 |
| 2008 | 4 | 28 | -0.024 | 0.00 | 0.093 |
| 2008 | 4 | 29 | -0.116 | 0.00 | 0.081 |
| 2008 | 4 | 30 | 0.084  | 0.00 | 0.067 |
| 2008 | 4 | 31 | -0.077 | 0.00 | 0.257 |
| 2008 | 4 | 32 | 0.048  | 0.02 | 0.234 |
| 2008 | 4 | 33 | 0.143  | 0.00 | 0.001 |
| 2008 | 4 | 34 | 0.087  | 0.00 | 0.101 |
| 2008 | 4 | 35 | -0.085 | 0.00 | 0.094 |
| 2008 | 4 | 36 | 0.160  | 0.00 | 0.072 |
| 2008 | 4 | 37 | 0.159  | 0.00 | 0.045 |
| 2008 | 4 | 38 | 0.166  | 0.00 | 0.074 |
| 2008 | 5 | 10 | 0.092  | 0.01 | 0.017 |
| 2008 | 5 | 11 | -0.090 | 0.01 | 0.017 |
| 2008 | 5 | 12 | 0.203  | 0.01 | 0.017 |
| 2008 | 5 | 13 | -0.042 | 0.01 | 0.019 |
| 2008 | 5 | 14 | -0.022 | 0.00 | 0.017 |
| 2008 | 5 | 15 | 0.126  | 0.02 | 0.018 |
| 2008 | 5 | 17 | -0.124 | 0.02 | 0.128 |
| 2008 | 5 | 18 | 0.116  | 0.00 | 0.063 |
| 2008 | 5 | 19 | 0.245  | 0.01 | 0.035 |
| 2008 | 5 | 20 | 0.229  | 0.00 | 0.036 |
| 2008 | 5 | 21 | 0.255  | 0.01 | 0.037 |
| 2008 | 5 | 22 | 0.116  | 0.01 | 0.039 |
| 2008 | 5 | 23 | -0.107 | 0.00 | 0.001 |
| 2008 | 5 | 24 | 0.106  | 0.00 | 0.024 |
| 2008 | 5 | 25 | -0.201 | 0.00 | 0.005 |
| 2008 | 5 | 26 | -0.242 | 0.00 | 0.002 |
| 2008 | 5 | 27 | 0.021  | 0.00 | 0.118 |
| 2008 | 5 | 28 | 0.102  | 0.00 | 0.095 |
| 2008 | 5 | 29 | 0.086  | 0.00 | 0.083 |
| 2008 | 5 | 30 | 0.155  | 0.00 | 0.071 |
| 2008 | 5 | 31 | 0.051  | 0.00 | 0.244 |
| 2008 | 5 | 32 | 0.254  | 0.02 | 0.221 |
| 2008 | 5 | 33 | -0.026 | 0.00 | 0.016 |
| 2008 | 5 | 34 | 0.051  | 0.00 | 0.095 |
| 2008 | 5 | 35 | 0.434  | 0.00 | 0.108 |
| 2008 | 5 | 36 | 0.243  | 0.00 | 0.069 |
| 2008 | 5 | 37 | 0.094  | 0.00 | 0.041 |

|      |    |    |        |      |       |
|------|----|----|--------|------|-------|
| 2008 | 5  | 38 | 0.179  | 0.00 | 0.071 |
| 2008 | 10 | 11 | 0.504  | 0.97 | 0.893 |
| 2008 | 10 | 12 | 0.415  | 1.02 | 0.906 |
| 2008 | 10 | 13 | 0.358  | 0.81 | 0.855 |
| 2008 | 10 | 14 | 0.462  | 0.84 | 0.724 |
| 2008 | 10 | 15 | 0.465  | 0.93 | 0.819 |
| 2008 | 10 | 17 | 0.021  | 0.00 | 0.000 |
| 2008 | 10 | 18 | 0.166  | 0.00 | 0.000 |
| 2008 | 10 | 19 | 0.227  | 0.05 | 0.288 |
| 2008 | 10 | 20 | -0.091 | 0.03 | 0.216 |
| 2008 | 10 | 21 | 0.066  | 0.06 | 0.291 |
| 2008 | 10 | 22 | 0.213  | 0.03 | 0.240 |
| 2008 | 10 | 23 | -0.122 | 0.00 | 0.000 |
| 2008 | 10 | 24 | -0.089 | 0.00 | 0.066 |
| 2008 | 10 | 25 | -0.259 | 0.00 | 0.000 |
| 2008 | 10 | 26 | -0.039 | 0.00 | 0.000 |
| 2008 | 10 | 27 | 0.105  | 0.00 | 0.039 |
| 2008 | 10 | 28 | 0.273  | 0.00 | 0.074 |
| 2008 | 10 | 29 | 0.073  | 0.00 | 0.070 |
| 2008 | 10 | 30 | 0.108  | 0.00 | 0.094 |
| 2008 | 10 | 31 | 0.032  | 0.00 | 0.005 |
| 2008 | 10 | 32 | -0.082 | 0.00 | 0.007 |
| 2008 | 10 | 33 | -0.052 | 0.06 | 0.365 |
| 2008 | 10 | 34 | 0.127  | 0.00 | 0.035 |
| 2008 | 10 | 35 | 0.078  | 0.00 | 0.161 |
| 2008 | 10 | 36 | -0.058 | 0.00 | 0.003 |
| 2008 | 10 | 37 | -0.086 | 0.00 | 0.005 |
| 2008 | 10 | 38 | -0.055 | 0.00 | 0.002 |
| 2008 | 11 | 12 | 0.371  | 0.99 | 0.865 |
| 2008 | 11 | 13 | 0.480  | 0.84 | 0.865 |
| 2008 | 11 | 14 | 0.626  | 0.80 | 0.684 |
| 2008 | 11 | 15 | 0.267  | 0.88 | 0.780 |
| 2008 | 11 | 17 | 0.087  | 0.00 | 0.000 |
| 2008 | 11 | 18 | 0.228  | 0.00 | 0.000 |
| 2008 | 11 | 19 | -0.014 | 0.04 | 0.255 |
| 2008 | 11 | 20 | -0.405 | 0.01 | 0.190 |
| 2008 | 11 | 21 | -0.138 | 0.05 | 0.262 |
| 2008 | 11 | 22 | 0.018  | 0.02 | 0.200 |
| 2008 | 11 | 23 | -0.167 | 0.00 | 0.000 |
| 2008 | 11 | 24 | -0.032 | 0.00 | 0.063 |
| 2008 | 11 | 25 | -0.112 | 0.00 | 0.000 |
| 2008 | 11 | 26 | 0.222  | 0.00 | 0.000 |
| 2008 | 11 | 27 | 0.126  | 0.00 | 0.032 |
| 2008 | 11 | 28 | 0.111  | 0.00 | 0.071 |
| 2008 | 11 | 29 | -0.217 | 0.00 | 0.061 |
| 2008 | 11 | 30 | 0.118  | 0.00 | 0.085 |

|      |    |    |        |      |       |
|------|----|----|--------|------|-------|
| 2008 | 11 | 31 | -0.193 | 0.00 | 0.004 |
| 2008 | 11 | 32 | -0.219 | 0.00 | 0.006 |
| 2008 | 11 | 33 | -0.079 | 0.06 | 0.368 |
| 2008 | 11 | 34 | -0.004 | 0.00 | 0.031 |
| 2008 | 11 | 35 | -0.121 | 0.00 | 0.137 |
| 2008 | 11 | 36 | -0.083 | 0.00 | 0.003 |
| 2008 | 11 | 37 | -0.223 | 0.00 | 0.005 |
| 2008 | 11 | 38 | 0.081  | 0.00 | 0.002 |
| 2008 | 12 | 13 | 0.346  | 0.86 | 0.878 |
| 2008 | 12 | 14 | 0.186  | 0.80 | 0.691 |
| 2008 | 12 | 15 | 0.228  | 0.90 | 0.800 |
| 2008 | 12 | 17 | 0.029  | 0.00 | 0.000 |
| 2008 | 12 | 18 | 0.226  | 0.00 | 0.000 |
| 2008 | 12 | 19 | 0.428  | 0.05 | 0.288 |
| 2008 | 12 | 20 | 0.157  | 0.03 | 0.216 |
| 2008 | 12 | 21 | 0.131  | 0.07 | 0.294 |
| 2008 | 12 | 22 | 0.254  | 0.02 | 0.241 |
| 2008 | 12 | 23 | -0.153 | 0.00 | 0.000 |
| 2008 | 12 | 24 | -0.063 | 0.00 | 0.067 |
| 2008 | 12 | 25 | -0.125 | 0.00 | 0.000 |
| 2008 | 12 | 26 | 0.216  | 0.00 | 0.000 |
| 2008 | 12 | 27 | -0.191 | 0.00 | 0.037 |
| 2008 | 12 | 28 | 0.045  | 0.00 | 0.073 |
| 2008 | 12 | 29 | -0.087 | 0.00 | 0.066 |
| 2008 | 12 | 30 | -0.258 | 0.00 | 0.091 |
| 2008 | 12 | 31 | -0.070 | 0.00 | 0.004 |
| 2008 | 12 | 32 | 0.132  | 0.00 | 0.006 |
| 2008 | 12 | 33 | -0.090 | 0.08 | 0.404 |
| 2008 | 12 | 34 | -0.139 | 0.00 | 0.032 |
| 2008 | 12 | 35 | 0.249  | 0.00 | 0.159 |
| 2008 | 12 | 36 | -0.138 | 0.00 | 0.003 |
| 2008 | 12 | 37 | -0.064 | 0.00 | 0.004 |
| 2008 | 12 | 38 | -0.021 | 0.00 | 0.002 |
| 2008 | 13 | 14 | 0.505  | 0.71 | 0.694 |
| 2008 | 13 | 15 | 0.396  | 0.83 | 0.805 |
| 2008 | 13 | 17 | -0.159 | 0.00 | 0.000 |
| 2008 | 13 | 18 | 0.334  | 0.00 | 0.000 |
| 2008 | 13 | 19 | 0.413  | 0.03 | 0.304 |
| 2008 | 13 | 20 | 0.077  | 0.03 | 0.230 |
| 2008 | 13 | 21 | 0.226  | 0.05 | 0.313 |
| 2008 | 13 | 22 | 0.194  | 0.03 | 0.253 |
| 2008 | 13 | 23 | -0.010 | 0.00 | 0.000 |
| 2008 | 13 | 24 | 0.140  | 0.00 | 0.084 |
| 2008 | 13 | 25 | -0.056 | 0.00 | 0.000 |
| 2008 | 13 | 26 | 0.203  | 0.00 | 0.000 |
| 2008 | 13 | 27 | 0.176  | 0.00 | 0.039 |

|      |    |    |        |      |       |
|------|----|----|--------|------|-------|
| 2008 | 13 | 28 | 0.324  | 0.00 | 0.074 |
| 2008 | 13 | 29 | 0.122  | 0.00 | 0.068 |
| 2008 | 13 | 30 | 0.082  | 0.00 | 0.094 |
| 2008 | 13 | 31 | 0.016  | 0.00 | 0.004 |
| 2008 | 13 | 32 | 0.173  | 0.00 | 0.006 |
| 2008 | 13 | 33 | -0.162 | 0.03 | 0.330 |
| 2008 | 13 | 34 | -0.036 | 0.00 | 0.031 |
| 2008 | 13 | 35 | 0.118  | 0.00 | 0.176 |
| 2008 | 13 | 36 | -0.138 | 0.00 | 0.003 |
| 2008 | 13 | 37 | -0.167 | 0.00 | 0.004 |
| 2008 | 13 | 38 | 0.002  | 0.00 | 0.002 |
| 2008 | 14 | 15 | 0.275  | 0.98 | 0.857 |
| 2008 | 14 | 17 | -0.218 | 0.00 | 0.000 |
| 2008 | 14 | 18 | 0.273  | 0.00 | 0.000 |
| 2008 | 14 | 19 | 0.319  | 0.03 | 0.259 |
| 2008 | 14 | 20 | -0.199 | 0.02 | 0.235 |
| 2008 | 14 | 21 | 0.009  | 0.03 | 0.274 |
| 2008 | 14 | 22 | 0.144  | 0.01 | 0.250 |
| 2008 | 14 | 23 | 0.013  | 0.00 | 0.000 |
| 2008 | 14 | 24 | -0.134 | 0.00 | 0.061 |
| 2008 | 14 | 25 | -0.080 | 0.00 | 0.000 |
| 2008 | 14 | 26 | 0.108  | 0.00 | 0.000 |
| 2008 | 14 | 27 | 0.283  | 0.00 | 0.054 |
| 2008 | 14 | 28 | 0.207  | 0.00 | 0.052 |
| 2008 | 14 | 29 | 0.019  | 0.00 | 0.076 |
| 2008 | 14 | 30 | 0.231  | 0.00 | 0.080 |
| 2008 | 14 | 31 | -0.083 | 0.00 | 0.006 |
| 2008 | 14 | 32 | -0.033 | 0.00 | 0.009 |
| 2008 | 14 | 33 | -0.132 | 0.00 | 0.146 |
| 2008 | 14 | 34 | 0.042  | 0.00 | 0.045 |
| 2008 | 14 | 35 | -0.143 | 0.00 | 0.203 |
| 2008 | 14 | 36 | -0.013 | 0.00 | 0.004 |
| 2008 | 14 | 37 | -0.132 | 0.00 | 0.006 |
| 2008 | 14 | 38 | 0.162  | 0.00 | 0.003 |
| 2008 | 15 | 17 | -0.223 | 0.00 | 0.000 |
| 2008 | 15 | 18 | 0.135  | 0.00 | 0.000 |
| 2008 | 15 | 19 | 0.343  | 0.03 | 0.294 |
| 2008 | 15 | 20 | -0.057 | 0.02 | 0.244 |
| 2008 | 15 | 21 | 0.040  | 0.04 | 0.301 |
| 2008 | 15 | 22 | 0.359  | 0.03 | 0.264 |
| 2008 | 15 | 23 | -0.231 | 0.00 | 0.000 |
| 2008 | 15 | 24 | -0.006 | 0.00 | 0.073 |
| 2008 | 15 | 25 | -0.214 | 0.00 | 0.000 |
| 2008 | 15 | 26 | -0.132 | 0.00 | 0.000 |
| 2008 | 15 | 27 | 0.128  | 0.00 | 0.048 |
| 2008 | 15 | 28 | 0.119  | 0.00 | 0.080 |

|      |    |    |        |      |       |
|------|----|----|--------|------|-------|
| 2008 | 15 | 29 | 0.100  | 0.00 | 0.078 |
| 2008 | 15 | 30 | -0.076 | 0.00 | 0.106 |
| 2008 | 15 | 31 | 0.130  | 0.00 | 0.006 |
| 2008 | 15 | 32 | -0.054 | 0.00 | 0.008 |
| 2008 | 15 | 33 | -0.214 | 0.00 | 0.245 |
| 2008 | 15 | 34 | -0.077 | 0.00 | 0.039 |
| 2008 | 15 | 35 | 0.111  | 0.04 | 0.189 |
| 2008 | 15 | 36 | 0.014  | 0.00 | 0.004 |
| 2008 | 15 | 37 | -0.188 | 0.00 | 0.006 |
| 2008 | 15 | 38 | -0.158 | 0.00 | 0.003 |
| 2008 | 17 | 18 | 0.135  | 0.70 | 0.835 |
| 2008 | 17 | 19 | -0.274 | 0.00 | 0.001 |
| 2008 | 17 | 20 | -0.144 | 0.00 | 0.001 |
| 2008 | 17 | 21 | -0.454 | 0.00 | 0.002 |
| 2008 | 17 | 22 | -0.283 | 0.00 | 0.001 |
| 2008 | 17 | 23 | -0.222 | 0.00 | 0.022 |
| 2008 | 17 | 24 | -0.183 | 0.00 | 0.017 |
| 2008 | 17 | 25 | -0.252 | 0.00 | 0.050 |
| 2008 | 17 | 26 | -0.123 | 0.00 | 0.036 |
| 2008 | 17 | 27 | -0.004 | 0.00 | 0.043 |
| 2008 | 17 | 28 | -0.300 | 0.00 | 0.045 |
| 2008 | 17 | 29 | -0.269 | 0.00 | 0.028 |
| 2008 | 17 | 30 | -0.029 | 0.00 | 0.015 |
| 2008 | 17 | 31 | 0.016  | 0.00 | 0.109 |
| 2008 | 17 | 32 | -0.272 | 0.00 | 0.206 |
| 2008 | 17 | 33 | 0.049  | 0.00 | 0.000 |
| 2008 | 17 | 34 | 0.510  | 0.00 | 0.094 |
| 2008 | 17 | 35 | -0.234 | 0.00 | 0.032 |
| 2008 | 17 | 36 | 0.086  | 0.00 | 0.196 |
| 2008 | 17 | 37 | -0.120 | 0.00 | 0.178 |
| 2008 | 17 | 38 | 0.013  | 0.00 | 0.185 |
| 2008 | 18 | 19 | 0.020  | 0.00 | 0.001 |
| 2008 | 18 | 20 | -0.007 | 0.00 | 0.001 |
| 2008 | 18 | 21 | -0.154 | 0.00 | 0.002 |
| 2008 | 18 | 22 | -0.038 | 0.00 | 0.001 |
| 2008 | 18 | 23 | -0.103 | 0.00 | 0.022 |
| 2008 | 18 | 24 | -0.262 | 0.00 | 0.016 |
| 2008 | 18 | 25 | -0.288 | 0.00 | 0.049 |
| 2008 | 18 | 26 | -0.026 | 0.00 | 0.037 |
| 2008 | 18 | 27 | 0.167  | 0.00 | 0.031 |
| 2008 | 18 | 28 | 0.053  | 0.00 | 0.036 |
| 2008 | 18 | 29 | -0.032 | 0.00 | 0.021 |
| 2008 | 18 | 30 | 0.175  | 0.00 | 0.011 |
| 2008 | 18 | 31 | 0.056  | 0.00 | 0.060 |
| 2008 | 18 | 32 | 0.105  | 0.00 | 0.153 |
| 2008 | 18 | 33 | -0.123 | 0.00 | 0.000 |

|      |    |    |        |      |       |
|------|----|----|--------|------|-------|
| 2008 | 18 | 34 | 0.443  | 0.00 | 0.063 |
| 2008 | 18 | 35 | -0.020 | 0.00 | 0.025 |
| 2008 | 18 | 36 | -0.051 | 0.02 | 0.189 |
| 2008 | 18 | 37 | 0.046  | 0.00 | 0.158 |
| 2008 | 18 | 38 | -0.174 | 0.00 | 0.178 |
| 2008 | 19 | 20 | 0.461  | 0.56 | 0.830 |
| 2008 | 19 | 21 | 0.280  | 0.82 | 0.904 |
| 2008 | 19 | 22 | 0.606  | 0.60 | 0.878 |
| 2008 | 19 | 23 | -0.123 | 0.01 | 0.025 |
| 2008 | 19 | 24 | 0.131  | 0.20 | 0.242 |
| 2008 | 19 | 25 | -0.240 | 0.01 | 0.025 |
| 2008 | 19 | 26 | -0.036 | 0.01 | 0.025 |
| 2008 | 19 | 27 | -0.011 | 0.00 | 0.078 |
| 2008 | 19 | 28 | 0.045  | 0.00 | 0.077 |
| 2008 | 19 | 29 | -0.073 | 0.00 | 0.119 |
| 2008 | 19 | 30 | -0.080 | 0.00 | 0.116 |
| 2008 | 19 | 31 | -0.002 | 0.00 | 0.026 |
| 2008 | 19 | 32 | 0.285  | 0.00 | 0.023 |
| 2008 | 19 | 33 | -0.141 | 0.00 | 0.139 |
| 2008 | 19 | 34 | -0.073 | 0.00 | 0.044 |
| 2008 | 19 | 35 | 0.292  | 0.02 | 0.446 |
| 2008 | 19 | 36 | 0.189  | 0.00 | 0.033 |
| 2008 | 19 | 37 | 0.009  | 0.00 | 0.034 |
| 2008 | 19 | 38 | -0.085 | 0.00 | 0.032 |
| 2008 | 20 | 21 | 0.388  | 0.62 | 0.847 |
| 2008 | 20 | 22 | 0.179  | 0.60 | 0.894 |
| 2008 | 20 | 23 | -0.057 | 0.00 | 0.017 |
| 2008 | 20 | 24 | -0.220 | 0.23 | 0.237 |
| 2008 | 20 | 25 | -0.367 | 0.00 | 0.017 |
| 2008 | 20 | 26 | -0.210 | 0.00 | 0.017 |
| 2008 | 20 | 27 | -0.139 | 0.00 | 0.083 |
| 2008 | 20 | 28 | 0.036  | 0.00 | 0.069 |
| 2008 | 20 | 29 | -0.051 | 0.00 | 0.101 |
| 2008 | 20 | 30 | -0.150 | 0.00 | 0.106 |
| 2008 | 20 | 31 | 0.114  | 0.00 | 0.030 |
| 2008 | 20 | 32 | 0.444  | 0.00 | 0.026 |
| 2008 | 20 | 33 | 0.048  | 0.00 | 0.097 |
| 2008 | 20 | 34 | -0.064 | 0.00 | 0.038 |
| 2008 | 20 | 35 | 0.215  | 0.02 | 0.491 |
| 2008 | 20 | 36 | -0.007 | 0.00 | 0.025 |
| 2008 | 20 | 37 | 0.029  | 0.00 | 0.028 |
| 2008 | 20 | 38 | -0.111 | 0.00 | 0.025 |
| 2008 | 21 | 22 | 0.044  | 0.64 | 0.874 |
| 2008 | 21 | 23 | 0.047  | 0.00 | 0.027 |
| 2008 | 21 | 24 | 0.013  | 0.21 | 0.248 |
| 2008 | 21 | 25 | -0.180 | 0.01 | 0.027 |

|      |    |    |        |      |       |
|------|----|----|--------|------|-------|
| 2008 | 21 | 26 | -0.005 | 0.01 | 0.027 |
| 2008 | 21 | 27 | -0.020 | 0.00 | 0.087 |
| 2008 | 21 | 28 | 0.320  | 0.00 | 0.089 |
| 2008 | 21 | 29 | 0.244  | 0.00 | 0.124 |
| 2008 | 21 | 30 | -0.008 | 0.00 | 0.126 |
| 2008 | 21 | 31 | -0.039 | 0.00 | 0.037 |
| 2008 | 21 | 32 | 0.404  | 0.00 | 0.030 |
| 2008 | 21 | 33 | -0.073 | 0.00 | 0.146 |
| 2008 | 21 | 34 | -0.293 | 0.00 | 0.047 |
| 2008 | 21 | 35 | 0.360  | 0.02 | 0.460 |
| 2008 | 21 | 36 | -0.019 | 0.00 | 0.035 |
| 2008 | 21 | 37 | 0.066  | 0.00 | 0.038 |
| 2008 | 21 | 38 | -0.206 | 0.00 | 0.035 |
| 2008 | 22 | 23 | -0.251 | 0.01 | 0.023 |
| 2008 | 22 | 24 | -0.101 | 0.20 | 0.243 |
| 2008 | 22 | 25 | -0.275 | 0.01 | 0.023 |
| 2008 | 22 | 26 | 0.078  | 0.01 | 0.023 |
| 2008 | 22 | 27 | 0.017  | 0.00 | 0.077 |
| 2008 | 22 | 28 | -0.109 | 0.00 | 0.062 |
| 2008 | 22 | 29 | -0.008 | 0.00 | 0.094 |
| 2008 | 22 | 30 | 0.065  | 0.00 | 0.097 |
| 2008 | 22 | 31 | 0.012  | 0.00 | 0.031 |
| 2008 | 22 | 32 | 0.097  | 0.00 | 0.026 |
| 2008 | 22 | 33 | -0.129 | 0.00 | 0.098 |
| 2008 | 22 | 34 | -0.060 | 0.00 | 0.036 |
| 2008 | 22 | 35 | 0.215  | 0.02 | 0.471 |
| 2008 | 22 | 36 | 0.059  | 0.00 | 0.032 |
| 2008 | 22 | 37 | -0.155 | 0.00 | 0.033 |
| 2008 | 22 | 38 | -0.114 | 0.00 | 0.032 |
| 2008 | 23 | 24 | 0.467  | 0.49 | 0.718 |
| 2008 | 23 | 25 | 0.281  | 0.54 | 0.747 |
| 2008 | 23 | 26 | -0.063 | 0.54 | 0.748 |
| 2008 | 23 | 27 | -0.100 | 0.00 | 0.007 |
| 2008 | 23 | 28 | 0.003  | 0.00 | 0.053 |
| 2008 | 23 | 29 | -0.092 | 0.00 | 0.013 |
| 2008 | 23 | 30 | -0.113 | 0.00 | 0.001 |
| 2008 | 23 | 31 | 0.011  | 0.00 | 0.092 |
| 2008 | 23 | 32 | 0.199  | 0.00 | 0.068 |
| 2008 | 23 | 33 | 0.025  | 0.00 | 0.000 |
| 2008 | 23 | 34 | -0.170 | 0.04 | 0.168 |
| 2008 | 23 | 35 | -0.257 | 0.00 | 0.001 |
| 2008 | 23 | 36 | -0.250 | 0.07 | 0.443 |
| 2008 | 23 | 37 | -0.252 | 0.07 | 0.447 |
| 2008 | 23 | 38 | -0.108 | 0.08 | 0.464 |
| 2008 | 24 | 25 | 0.226  | 0.58 | 0.735 |
| 2008 | 24 | 26 | -0.144 | 0.50 | 0.696 |



|      |    |    |        |      |       |
|------|----|----|--------|------|-------|
| 2008 | 24 | 27 | 0.026  | 0.00 | 0.023 |
| 2008 | 24 | 28 | 0.032  | 0.00 | 0.063 |
| 2008 | 24 | 29 | -0.059 | 0.00 | 0.031 |
| 2008 | 24 | 30 | 0.024  | 0.00 | 0.021 |
| 2008 | 24 | 31 | -0.155 | 0.00 | 0.097 |
| 2008 | 24 | 32 | -0.015 | 0.00 | 0.068 |
| 2008 | 24 | 33 | 0.034  | 0.00 | 0.051 |
| 2008 | 24 | 34 | -0.223 | 0.02 | 0.167 |
| 2008 | 24 | 35 | 0.087  | 0.00 | 0.135 |
| 2008 | 24 | 36 | -0.157 | 0.04 | 0.401 |
| 2008 | 24 | 37 | -0.335 | 0.03 | 0.447 |
| 2008 | 24 | 38 | -0.072 | 0.04 | 0.404 |
| 2008 | 25 | 26 | 0.025  | 0.60 | 0.714 |
| 2008 | 25 | 27 | -0.118 | 0.00 | 0.017 |
| 2008 | 25 | 28 | -0.180 | 0.00 | 0.067 |
| 2008 | 25 | 29 | -0.066 | 0.00 | 0.021 |
| 2008 | 25 | 30 | -0.138 | 0.00 | 0.002 |
| 2008 | 25 | 31 | -0.268 | 0.00 | 0.135 |
| 2008 | 25 | 32 | -0.201 | 0.00 | 0.106 |
| 2008 | 25 | 33 | -0.137 | 0.00 | 0.000 |
| 2008 | 25 | 34 | -0.370 | 0.03 | 0.233 |
| 2008 | 25 | 35 | -0.171 | 0.00 | 0.004 |
| 2008 | 25 | 36 | -0.373 | 0.07 | 0.483 |
| 2008 | 25 | 37 | -0.434 | 0.06 | 0.531 |
| 2008 | 25 | 38 | -0.464 | 0.07 | 0.474 |
| 2008 | 26 | 27 | -0.183 | 0.00 | 0.008 |
| 2008 | 26 | 28 | -0.096 | 0.00 | 0.047 |
| 2008 | 26 | 29 | -0.114 | 0.00 | 0.013 |
| 2008 | 26 | 30 | -0.224 | 0.00 | 0.001 |
| 2008 | 26 | 31 | -0.320 | 0.00 | 0.089 |
| 2008 | 26 | 32 | 0.054  | 0.00 | 0.070 |
| 2008 | 26 | 33 | 0.022  | 0.00 | 0.000 |
| 2008 | 26 | 34 | -0.190 | 0.03 | 0.180 |
| 2008 | 26 | 35 | -0.204 | 0.00 | 0.001 |
| 2008 | 26 | 36 | -0.283 | 0.09 | 0.474 |
| 2008 | 26 | 37 | 0.071  | 0.08 | 0.459 |
| 2008 | 26 | 38 | -0.054 | 0.11 | 0.492 |
| 2008 | 27 | 28 | 0.456  | 0.68 | 0.849 |
| 2008 | 27 | 29 | 0.279  | 0.52 | 0.775 |
| 2008 | 27 | 30 | 0.652  | 0.55 | 0.796 |
| 2008 | 27 | 31 | 0.154  | 0.00 | 0.348 |
| 2008 | 27 | 32 | 0.174  | 0.00 | 0.339 |
| 2008 | 27 | 33 | 0.097  | 0.00 | 0.003 |
| 2008 | 27 | 34 | 0.155  | 0.03 | 0.418 |
| 2008 | 27 | 35 | 0.014  | 0.07 | 0.409 |
| 2008 | 27 | 36 | -0.007 | 0.00 | 0.089 |

|      |    |    |        |      |       |
|------|----|----|--------|------|-------|
| 2008 | 27 | 37 | -0.048 | 0.00 | 0.098 |
| 2008 | 27 | 38 | -0.071 | 0.00 | 0.083 |
| 2008 | 28 | 29 | 0.605  | 0.53 | 0.737 |
| 2008 | 28 | 30 | 0.117  | 0.50 | 0.775 |
| 2008 | 28 | 31 | 0.102  | 0.00 | 0.344 |
| 2008 | 28 | 32 | 0.444  | 0.00 | 0.334 |
| 2008 | 28 | 33 | -0.054 | 0.00 | 0.048 |
| 2008 | 28 | 34 | -0.049 | 0.03 | 0.425 |
| 2008 | 28 | 35 | 0.084  | 0.04 | 0.344 |
| 2008 | 28 | 36 | -0.063 | 0.00 | 0.138 |
| 2008 | 28 | 37 | 0.027  | 0.00 | 0.149 |
| 2008 | 28 | 38 | -0.209 | 0.00 | 0.134 |
| 2008 | 29 | 30 | 0.218  | 0.78 | 0.893 |
| 2008 | 29 | 31 | 0.082  | 0.00 | 0.243 |
| 2008 | 29 | 32 | 0.323  | 0.03 | 0.233 |
| 2008 | 29 | 33 | -0.204 | 0.00 | 0.021 |
| 2008 | 29 | 34 | 0.056  | 0.06 | 0.344 |
| 2008 | 29 | 35 | 0.129  | 0.08 | 0.448 |
| 2008 | 29 | 36 | -0.132 | 0.00 | 0.080 |
| 2008 | 29 | 37 | -0.057 | 0.00 | 0.090 |
| 2008 | 29 | 38 | -0.249 | 0.00 | 0.076 |
| 2008 | 30 | 31 | -0.097 | 0.00 | 0.217 |
| 2008 | 30 | 32 | -0.098 | 0.02 | 0.209 |
| 2008 | 30 | 33 | 0.190  | 0.00 | 0.052 |
| 2008 | 30 | 34 | 0.244  | 0.07 | 0.321 |
| 2008 | 30 | 35 | 0.054  | 0.08 | 0.430 |
| 2008 | 30 | 36 | -0.132 | 0.00 | 0.051 |
| 2008 | 30 | 37 | -0.057 | 0.00 | 0.063 |
| 2008 | 30 | 38 | -0.249 | 0.00 | 0.049 |
| 2008 | 31 | 32 | 0.330  | 0.57 | 0.800 |
| 2008 | 31 | 33 | -0.206 | 0.00 | 0.000 |
| 2008 | 31 | 34 | -0.063 | 0.08 | 0.372 |
| 2008 | 31 | 35 | -0.087 | 0.00 | 0.187 |
| 2008 | 31 | 36 | -0.214 | 0.02 | 0.227 |
| 2008 | 31 | 37 | -0.273 | 0.02 | 0.291 |
| 2008 | 31 | 38 | -0.253 | 0.02 | 0.209 |
| 2008 | 32 | 33 | -0.020 | 0.00 | 0.000 |
| 2008 | 32 | 34 | -0.119 | 0.10 | 0.406 |
| 2008 | 32 | 35 | 0.193  | 0.00 | 0.162 |
| 2008 | 32 | 36 | -0.013 | 0.02 | 0.232 |
| 2008 | 32 | 37 | 0.194  | 0.04 | 0.280 |
| 2008 | 32 | 38 | -0.146 | 0.02 | 0.215 |
| 2008 | 33 | 34 | 0.060  | 0.00 | 0.000 |
| 2008 | 33 | 35 | -0.105 | 0.00 | 0.052 |
| 2008 | 33 | 36 | -0.214 | 0.00 | 0.000 |
| 2008 | 33 | 37 | 0.065  | 0.00 | 0.000 |

|      |    |    |        |      |       |
|------|----|----|--------|------|-------|
| 2008 | 33 | 38 | -0.151 | 0.00 | 0.000 |
| 2008 | 34 | 35 | -0.219 | 0.00 | 0.234 |
| 2008 | 34 | 36 | 0.328  | 0.12 | 0.304 |
| 2008 | 34 | 37 | 0.245  | 0.10 | 0.335 |
| 2008 | 34 | 38 | 0.144  | 0.10 | 0.290 |
| 2008 | 35 | 36 | -0.005 | 0.00 | 0.046 |
| 2008 | 35 | 37 | -0.036 | 0.00 | 0.053 |
| 2008 | 35 | 38 | -0.189 | 0.00 | 0.045 |
| 2008 | 36 | 37 | 0.198  | 0.34 | 0.681 |
| 2008 | 36 | 38 | 0.294  | 0.85 | 0.897 |
| 2008 | 37 | 38 | -0.065 | 0.41 | 0.656 |
| 2009 | 10 | 12 | 0.415  | 0.36 | 0.728 |
| 2009 | 10 | 22 | 0.213  | 0.00 | 0.289 |
| 2009 | 10 | 23 | -0.122 | 0.00 | 0.000 |
| 2009 | 10 | 26 | -0.039 | 0.00 | 0.000 |
| 2009 | 10 | 28 | 0.273  | 0.00 | 0.001 |
| 2009 | 10 | 29 | 0.073  | 0.00 | 0.030 |
| 2009 | 10 | 30 | 0.108  | 0.00 | 0.004 |
| 2009 | 10 | 32 | -0.082 | 0.00 | 0.000 |
| 2009 | 10 | 33 | -0.052 | 0.22 | 0.743 |
| 2009 | 10 | 34 | 0.127  | 0.00 | 0.000 |
| 2009 | 10 | 36 | -0.058 | 0.00 | 0.000 |
| 2009 | 10 | 37 | -0.086 | 0.00 | 0.000 |
| 2009 | 10 | 38 | -0.055 | 0.00 | 0.000 |
| 2009 | 10 | 39 | -0.125 | 0.00 | 0.007 |
| 2009 | 10 | 40 | -0.187 | 0.00 | 0.019 |
| 2009 | 10 | 41 | 0.278  | 0.00 | 0.000 |
| 2009 | 10 | 42 | 0.072  | 0.00 | 0.000 |
| 2009 | 10 | 43 | -0.140 | 0.00 | 0.152 |
| 2009 | 10 | 44 | -0.006 | 0.00 | 0.335 |
| 2009 | 10 | 45 | 0.396  | 0.00 | 0.001 |
| 2009 | 10 | 46 | -0.040 | 0.00 | 0.000 |
| 2009 | 10 | 47 | -0.077 | 0.00 | 0.000 |
| 2009 | 10 | 48 | 0.033  | 0.00 | 0.000 |
| 2009 | 10 | 49 | -0.076 | 0.00 | 0.061 |
| 2009 | 10 | 50 | -0.089 | 0.00 | 0.040 |
| 2009 | 10 | 51 | 0.148  | 0.00 | 0.534 |
| 2009 | 10 | 52 | -0.449 | 0.00 | 0.509 |
| 2009 | 10 | 53 | -0.222 | 0.00 | 0.425 |
| 2009 | 10 | 54 | -0.087 | 0.00 | 0.512 |
| 2009 | 12 | 22 | 0.254  | 0.15 | 0.343 |
| 2009 | 12 | 23 | -0.153 | 0.00 | 0.000 |
| 2009 | 12 | 26 | 0.216  | 0.00 | 0.000 |
| 2009 | 12 | 28 | 0.045  | 0.00 | 0.001 |
| 2009 | 12 | 29 | -0.087 | 0.00 | 0.030 |
| 2009 | 12 | 30 | -0.258 | 0.00 | 0.003 |

|      |    |    |        |      |       |
|------|----|----|--------|------|-------|
| 2009 | 12 | 32 | 0.132  | 0.00 | 0.000 |
| 2009 | 12 | 33 | -0.090 | 0.39 | 0.813 |
| 2009 | 12 | 34 | -0.139 | 0.00 | 0.000 |
| 2009 | 12 | 36 | -0.138 | 0.00 | 0.000 |
| 2009 | 12 | 37 | -0.064 | 0.00 | 0.000 |
| 2009 | 12 | 38 | -0.021 | 0.00 | 0.000 |
| 2009 | 12 | 39 | -0.163 | 0.00 | 0.005 |
| 2009 | 12 | 40 | 0.150  | 0.00 | 0.021 |
| 2009 | 12 | 41 | -0.015 | 0.00 | 0.000 |
| 2009 | 12 | 42 | -0.296 | 0.00 | 0.000 |
| 2009 | 12 | 43 | -0.179 | 0.00 | 0.125 |
| 2009 | 12 | 44 | 0.310  | 0.03 | 0.270 |
| 2009 | 12 | 45 | 0.027  | 0.00 | 0.001 |
| 2009 | 12 | 46 | 0.033  | 0.00 | 0.000 |
| 2009 | 12 | 47 | -0.012 | 0.00 | 0.000 |
| 2009 | 12 | 48 | 0.095  | 0.00 | 0.000 |
| 2009 | 12 | 49 | 0.038  | 0.06 | 0.106 |
| 2009 | 12 | 50 | -0.176 | 0.00 | 0.075 |
| 2009 | 12 | 51 | 0.359  | 0.00 | 0.425 |
| 2009 | 12 | 52 | -0.069 | 0.00 | 0.430 |
| 2009 | 12 | 53 | -0.140 | 0.00 | 0.359 |
| 2009 | 12 | 54 | 0.109  | 0.00 | 0.423 |
| 2009 | 22 | 23 | -0.251 | 0.00 | 0.000 |
| 2009 | 22 | 26 | 0.078  | 0.00 | 0.000 |
| 2009 | 22 | 28 | -0.109 | 0.00 | 0.048 |
| 2009 | 22 | 29 | -0.008 | 0.00 | 0.100 |
| 2009 | 22 | 30 | 0.065  | 0.02 | 0.079 |
| 2009 | 22 | 32 | 0.097  | 0.00 | 0.003 |
| 2009 | 22 | 33 | -0.129 | 0.17 | 0.387 |
| 2009 | 22 | 34 | -0.060 | 0.00 | 0.024 |
| 2009 | 22 | 36 | 0.059  | 0.00 | 0.000 |
| 2009 | 22 | 37 | -0.155 | 0.00 | 0.000 |
| 2009 | 22 | 38 | -0.114 | 0.00 | 0.000 |
| 2009 | 22 | 39 | 0.057  | 0.04 | 0.111 |
| 2009 | 22 | 40 | 0.108  | 0.00 | 0.069 |
| 2009 | 22 | 41 | 0.065  | 0.00 | 0.009 |
| 2009 | 22 | 42 | 0.107  | 0.00 | 0.040 |
| 2009 | 22 | 43 | -0.354 | 0.00 | 0.176 |
| 2009 | 22 | 44 | 0.099  | 0.28 | 0.548 |
| 2009 | 22 | 45 | 0.150  | 0.00 | 0.043 |
| 2009 | 22 | 46 | -0.008 | 0.00 | 0.001 |
| 2009 | 22 | 47 | 0.053  | 0.00 | 0.003 |
| 2009 | 22 | 48 | 0.107  | 0.00 | 0.000 |
| 2009 | 22 | 49 | -0.102 | 0.03 | 0.299 |
| 2009 | 22 | 50 | 0.126  | 0.00 | 0.251 |
| 2009 | 22 | 51 | 0.216  | 0.00 | 0.050 |

|      |    |    |        |      |       |
|------|----|----|--------|------|-------|
| 2009 | 22 | 52 | -0.052 | 0.00 | 0.043 |
| 2009 | 22 | 53 | -0.061 | 0.00 | 0.024 |
| 2009 | 22 | 54 | 0.137  | 0.00 | 0.061 |
| 2009 | 23 | 26 | -0.063 | 0.84 | 0.940 |
| 2009 | 23 | 28 | 0.003  | 0.00 | 0.001 |
| 2009 | 23 | 29 | -0.092 | 0.00 | 0.000 |
| 2009 | 23 | 30 | -0.113 | 0.00 | 0.000 |
| 2009 | 23 | 32 | 0.199  | 0.00 | 0.004 |
| 2009 | 23 | 33 | 0.025  | 0.00 | 0.000 |
| 2009 | 23 | 34 | -0.170 | 0.00 | 0.003 |
| 2009 | 23 | 36 | -0.250 | 0.00 | 0.276 |
| 2009 | 23 | 37 | -0.252 | 0.00 | 0.322 |
| 2009 | 23 | 38 | -0.108 | 0.00 | 0.353 |
| 2009 | 23 | 39 | 0.026  | 0.00 | 0.001 |
| 2009 | 23 | 40 | -0.034 | 0.00 | 0.000 |
| 2009 | 23 | 41 | 0.118  | 0.15 | 0.690 |
| 2009 | 23 | 42 | -0.042 | 0.00 | 0.000 |
| 2009 | 23 | 43 | 0.048  | 0.00 | 0.000 |
| 2009 | 23 | 44 | -0.064 | 0.00 | 0.000 |
| 2009 | 23 | 45 | 0.048  | 0.00 | 0.000 |
| 2009 | 23 | 46 | -0.134 | 0.00 | 0.035 |
| 2009 | 23 | 47 | -0.036 | 0.00 | 0.034 |
| 2009 | 23 | 48 | 0.016  | 0.00 | 0.041 |
| 2009 | 23 | 49 | 0.019  | 0.00 | 0.000 |
| 2009 | 23 | 50 | 0.178  | 0.00 | 0.000 |
| 2009 | 23 | 51 | 0.148  | 0.00 | 0.000 |
| 2009 | 23 | 52 | -0.158 | 0.00 | 0.000 |
| 2009 | 23 | 53 | -0.078 | 0.00 | 0.000 |
| 2009 | 23 | 54 | -0.129 | 0.00 | 0.000 |
| 2009 | 26 | 28 | -0.096 | 0.00 | 0.001 |
| 2009 | 26 | 29 | -0.114 | 0.00 | 0.000 |
| 2009 | 26 | 30 | -0.224 | 0.00 | 0.000 |
| 2009 | 26 | 32 | 0.054  | 0.00 | 0.004 |
| 2009 | 26 | 33 | 0.022  | 0.00 | 0.000 |
| 2009 | 26 | 34 | -0.190 | 0.00 | 0.003 |
| 2009 | 26 | 36 | -0.283 | 0.00 | 0.273 |
| 2009 | 26 | 37 | 0.071  | 0.00 | 0.315 |
| 2009 | 26 | 38 | -0.054 | 0.00 | 0.347 |
| 2009 | 26 | 39 | -0.105 | 0.00 | 0.000 |
| 2009 | 26 | 40 | 0.171  | 0.00 | 0.000 |
| 2009 | 26 | 41 | -0.167 | 0.14 | 0.679 |
| 2009 | 26 | 42 | -0.128 | 0.00 | 0.000 |
| 2009 | 26 | 43 | -0.229 | 0.00 | 0.000 |
| 2009 | 26 | 44 | 0.247  | 0.00 | 0.000 |
| 2009 | 26 | 45 | -0.292 | 0.00 | 0.000 |
| 2009 | 26 | 46 | -0.224 | 0.00 | 0.033 |

|      |    |    |        |      |       |
|------|----|----|--------|------|-------|
| 2009 | 26 | 47 | -0.090 | 0.00 | 0.033 |
| 2009 | 26 | 48 | -0.246 | 0.00 | 0.039 |
| 2009 | 26 | 49 | 0.162  | 0.00 | 0.000 |
| 2009 | 26 | 50 | -0.098 | 0.00 | 0.000 |
| 2009 | 26 | 51 | 0.219  | 0.00 | 0.000 |
| 2009 | 26 | 52 | 0.231  | 0.00 | 0.000 |
| 2009 | 26 | 53 | -0.216 | 0.00 | 0.000 |
| 2009 | 26 | 54 | 0.037  | 0.00 | 0.000 |
| 2009 | 28 | 29 | 0.605  | 0.40 | 0.528 |
| 2009 | 28 | 30 | 0.117  | 0.67 | 0.790 |
| 2009 | 28 | 32 | 0.444  | 0.00 | 0.170 |
| 2009 | 28 | 33 | -0.054 | 0.00 | 0.002 |
| 2009 | 28 | 34 | -0.049 | 0.19 | 0.565 |
| 2009 | 28 | 36 | -0.063 | 0.00 | 0.015 |
| 2009 | 28 | 37 | 0.027  | 0.00 | 0.014 |
| 2009 | 28 | 38 | -0.209 | 0.00 | 0.019 |
| 2009 | 28 | 39 | 0.013  | 0.07 | 0.442 |
| 2009 | 28 | 40 | -0.192 | 0.13 | 0.593 |
| 2009 | 28 | 41 | 0.171  | 0.00 | 0.032 |
| 2009 | 28 | 42 | 0.073  | 0.15 | 0.665 |
| 2009 | 28 | 43 | -0.033 | 0.00 | 0.042 |
| 2009 | 28 | 44 | 0.063  | 0.00 | 0.007 |
| 2009 | 28 | 45 | 0.525  | 0.81 | 0.935 |
| 2009 | 28 | 46 | -0.103 | 0.00 | 0.066 |
| 2009 | 28 | 47 | -0.134 | 0.00 | 0.082 |
| 2009 | 28 | 48 | 0.161  | 0.00 | 0.050 |
| 2009 | 28 | 49 | 0.328  | 0.00 | 0.070 |
| 2009 | 28 | 50 | 0.135  | 0.00 | 0.064 |
| 2009 | 28 | 51 | 0.044  | 0.00 | 0.000 |
| 2009 | 28 | 52 | -0.298 | 0.00 | 0.000 |
| 2009 | 28 | 53 | -0.049 | 0.00 | 0.000 |
| 2009 | 28 | 54 | 0.067  | 0.03 | 0.033 |
| 2009 | 29 | 30 | 0.218  | 0.32 | 0.508 |
| 2009 | 29 | 32 | 0.323  | 0.00 | 0.311 |
| 2009 | 29 | 33 | -0.204 | 0.00 | 0.032 |
| 2009 | 29 | 34 | 0.056  | 0.16 | 0.504 |
| 2009 | 29 | 36 | -0.132 | 0.00 | 0.009 |
| 2009 | 29 | 37 | -0.057 | 0.00 | 0.008 |
| 2009 | 29 | 38 | -0.249 | 0.00 | 0.014 |
| 2009 | 29 | 39 | -0.014 | 0.11 | 0.353 |
| 2009 | 29 | 40 | -0.214 | 0.08 | 0.687 |
| 2009 | 29 | 41 | 0.023  | 0.00 | 0.031 |
| 2009 | 29 | 42 | 0.116  | 0.07 | 0.663 |
| 2009 | 29 | 43 | -0.172 | 0.00 | 0.080 |
| 2009 | 29 | 44 | -0.098 | 0.00 | 0.041 |
| 2009 | 29 | 45 | 0.333  | 0.39 | 0.520 |

|      |    |    |        |      |       |
|------|----|----|--------|------|-------|
| 2009 | 29 | 46 | -0.061 | 0.00 | 0.137 |
| 2009 | 29 | 47 | -0.217 | 0.00 | 0.172 |
| 2009 | 29 | 48 | 0.022  | 0.00 | 0.104 |
| 2009 | 29 | 49 | 0.381  | 0.03 | 0.168 |
| 2009 | 29 | 50 | 0.183  | 0.02 | 0.156 |
| 2009 | 29 | 51 | -0.159 | 0.00 | 0.016 |
| 2009 | 29 | 52 | -0.442 | 0.00 | 0.013 |
| 2009 | 29 | 53 | -0.071 | 0.00 | 0.005 |
| 2009 | 29 | 54 | -0.107 | 0.00 | 0.047 |
| 2009 | 30 | 32 | -0.098 | 0.00 | 0.126 |
| 2009 | 30 | 33 | 0.190  | 0.00 | 0.005 |
| 2009 | 30 | 34 | 0.244  | 0.20 | 0.460 |
| 2009 | 30 | 36 | -0.056 | 0.00 | 0.004 |
| 2009 | 30 | 37 | -0.078 | 0.00 | 0.004 |
| 2009 | 30 | 38 | 0.075  | 0.00 | 0.008 |
| 2009 | 30 | 39 | 0.390  | 0.06 | 0.504 |
| 2009 | 30 | 40 | -0.090 | 0.24 | 0.595 |
| 2009 | 30 | 41 | 0.036  | 0.00 | 0.031 |
| 2009 | 30 | 42 | 0.156  | 0.12 | 0.567 |
| 2009 | 30 | 43 | -0.156 | 0.00 | 0.064 |
| 2009 | 30 | 44 | -0.237 | 0.00 | 0.017 |
| 2009 | 30 | 45 | 0.252  | 0.66 | 0.797 |
| 2009 | 30 | 46 | -0.110 | 0.00 | 0.040 |
| 2009 | 30 | 47 | 0.051  | 0.00 | 0.052 |
| 2009 | 30 | 48 | -0.138 | 0.00 | 0.028 |
| 2009 | 30 | 49 | -0.084 | 0.00 | 0.061 |
| 2009 | 30 | 50 | 0.299  | 0.00 | 0.055 |
| 2009 | 30 | 51 | -0.144 | 0.00 | 0.001 |
| 2009 | 30 | 52 | -0.041 | 0.00 | 0.001 |
| 2009 | 30 | 53 | -0.154 | 0.00 | 0.000 |
| 2009 | 30 | 54 | 0.242  | 0.03 | 0.034 |
| 2009 | 32 | 33 | -0.020 | 0.00 | 0.000 |
| 2009 | 32 | 34 | -0.119 | 0.04 | 0.230 |
| 2009 | 32 | 36 | -0.013 | 0.00 | 0.071 |
| 2009 | 32 | 37 | 0.194  | 0.00 | 0.073 |
| 2009 | 32 | 38 | -0.146 | 0.00 | 0.077 |
| 2009 | 32 | 39 | 0.191  | 0.00 | 0.093 |
| 2009 | 32 | 40 | 0.139  | 0.04 | 0.230 |
| 2009 | 32 | 41 | -0.047 | 0.00 | 0.028 |
| 2009 | 32 | 42 | 0.110  | 0.02 | 0.286 |
| 2009 | 32 | 43 | -0.136 | 0.00 | 0.003 |
| 2009 | 32 | 44 | 0.287  | 0.00 | 0.000 |
| 2009 | 32 | 45 | 0.296  | 0.00 | 0.147 |
| 2009 | 32 | 46 | 0.201  | 0.05 | 0.400 |
| 2009 | 32 | 47 | 0.300  | 0.06 | 0.579 |
| 2009 | 32 | 48 | 0.463  | 0.06 | 0.333 |

|      |    |    |        |      |       |
|------|----|----|--------|------|-------|
| 2009 | 32 | 49 | 0.178  | 0.00 | 0.080 |
| 2009 | 32 | 50 | 0.203  | 0.00 | 0.078 |
| 2009 | 32 | 51 | 0.250  | 0.00 | 0.000 |
| 2009 | 32 | 52 | 0.077  | 0.00 | 0.000 |
| 2009 | 32 | 53 | 0.186  | 0.00 | 0.000 |
| 2009 | 32 | 54 | 0.115  | 0.00 | 0.007 |
| 2009 | 33 | 34 | 0.060  | 0.00 | 0.001 |
| 2009 | 33 | 36 | -0.214 | 0.00 | 0.000 |
| 2009 | 33 | 37 | 0.065  | 0.00 | 0.000 |
| 2009 | 33 | 38 | -0.151 | 0.00 | 0.000 |
| 2009 | 33 | 39 | 0.133  | 0.00 | 0.010 |
| 2009 | 33 | 40 | 0.171  | 0.00 | 0.026 |
| 2009 | 33 | 41 | -0.090 | 0.00 | 0.000 |
| 2009 | 33 | 42 | -0.114 | 0.00 | 0.001 |
| 2009 | 33 | 43 | 0.282  | 0.00 | 0.137 |
| 2009 | 33 | 44 | -0.015 | 0.32 | 0.349 |
| 2009 | 33 | 45 | 0.017  | 0.00 | 0.001 |
| 2009 | 33 | 46 | -0.220 | 0.00 | 0.000 |
| 2009 | 33 | 47 | 0.168  | 0.00 | 0.000 |
| 2009 | 33 | 48 | -0.072 | 0.00 | 0.000 |
| 2009 | 33 | 49 | -0.182 | 0.02 | 0.124 |
| 2009 | 33 | 50 | -0.140 | 0.02 | 0.094 |
| 2009 | 33 | 51 | 0.166  | 0.02 | 0.397 |
| 2009 | 33 | 52 | 0.265  | 0.02 | 0.397 |
| 2009 | 33 | 53 | -0.016 | 0.00 | 0.332 |
| 2009 | 33 | 54 | 0.145  | 0.02 | 0.397 |
| 2009 | 34 | 36 | 0.328  | 0.00 | 0.057 |
| 2009 | 34 | 37 | 0.245  | 0.00 | 0.062 |
| 2009 | 34 | 38 | 0.144  | 0.00 | 0.063 |
| 2009 | 34 | 39 | 0.079  | 0.00 | 0.283 |
| 2009 | 34 | 40 | -0.121 | 0.14 | 0.501 |
| 2009 | 34 | 41 | -0.197 | 0.00 | 0.038 |
| 2009 | 34 | 42 | -0.270 | 0.19 | 0.699 |
| 2009 | 34 | 43 | -0.095 | 0.00 | 0.026 |
| 2009 | 34 | 44 | -0.001 | 0.00 | 0.002 |
| 2009 | 34 | 45 | 0.140  | 0.21 | 0.560 |
| 2009 | 34 | 46 | 0.170  | 0.00 | 0.085 |
| 2009 | 34 | 47 | 0.053  | 0.00 | 0.104 |
| 2009 | 34 | 48 | -0.186 | 0.00 | 0.082 |
| 2009 | 34 | 49 | -0.233 | 0.00 | 0.030 |
| 2009 | 34 | 50 | 0.083  | 0.00 | 0.027 |
| 2009 | 34 | 51 | -0.117 | 0.00 | 0.000 |
| 2009 | 34 | 52 | -0.032 | 0.00 | 0.000 |
| 2009 | 34 | 53 | 0.117  | 0.00 | 0.000 |
| 2009 | 34 | 54 | 0.153  | 0.00 | 0.033 |
| 2009 | 36 | 37 | 0.198  | 0.67 | 0.869 |



|      |    |    |        |      |       |
|------|----|----|--------|------|-------|
| 2009 | 36 | 38 | 0.294  | 0.49 | 0.845 |
| 2009 | 36 | 39 | 0.127  | 0.00 | 0.019 |
| 2009 | 36 | 40 | -0.109 | 0.00 | 0.005 |
| 2009 | 36 | 41 | -0.129 | 0.00 | 0.309 |
| 2009 | 36 | 42 | -0.083 | 0.00 | 0.008 |
| 2009 | 36 | 43 | -0.269 | 0.00 | 0.000 |
| 2009 | 36 | 44 | 0.284  | 0.00 | 0.000 |
| 2009 | 36 | 45 | -0.081 | 0.00 | 0.004 |
| 2009 | 36 | 46 | -0.028 | 0.00 | 0.243 |
| 2009 | 36 | 47 | -0.015 | 0.00 | 0.248 |
| 2009 | 36 | 48 | -0.059 | 0.00 | 0.244 |
| 2009 | 36 | 49 | -0.146 | 0.00 | 0.000 |
| 2009 | 36 | 50 | 0.022  | 0.00 | 0.000 |
| 2009 | 36 | 51 | -0.105 | 0.00 | 0.000 |
| 2009 | 36 | 52 | 0.140  | 0.00 | 0.000 |
| 2009 | 36 | 53 | 0.183  | 0.00 | 0.000 |
| 2009 | 36 | 54 | 0.122  | 0.00 | 0.000 |
| 2009 | 37 | 38 | -0.065 | 0.53 | 0.880 |
| 2009 | 37 | 39 | 0.067  | 0.00 | 0.022 |
| 2009 | 37 | 40 | 0.047  | 0.00 | 0.004 |
| 2009 | 37 | 41 | -0.379 | 0.05 | 0.347 |
| 2009 | 37 | 42 | -0.448 | 0.00 | 0.009 |
| 2009 | 37 | 43 | -0.131 | 0.00 | 0.000 |
| 2009 | 37 | 44 | -0.072 | 0.00 | 0.000 |
| 2009 | 37 | 45 | 0.043  | 0.00 | 0.003 |
| 2009 | 37 | 46 | 0.018  | 0.03 | 0.267 |
| 2009 | 37 | 47 | 0.095  | 0.00 | 0.269 |
| 2009 | 37 | 48 | -0.307 | 0.04 | 0.265 |
| 2009 | 37 | 49 | -0.179 | 0.00 | 0.000 |
| 2009 | 37 | 50 | -0.136 | 0.00 | 0.000 |
| 2009 | 37 | 51 | 0.036  | 0.00 | 0.000 |
| 2009 | 37 | 52 | -0.022 | 0.00 | 0.000 |
| 2009 | 37 | 53 | -0.105 | 0.00 | 0.000 |
| 2009 | 37 | 54 | 0.170  | 0.00 | 0.000 |
| 2009 | 38 | 39 | -0.237 | 0.00 | 0.015 |
| 2009 | 38 | 40 | -0.224 | 0.00 | 0.008 |
| 2009 | 38 | 41 | -0.039 | 0.05 | 0.419 |
| 2009 | 38 | 42 | -0.211 | 0.00 | 0.013 |
| 2009 | 38 | 43 | -0.386 | 0.00 | 0.000 |
| 2009 | 38 | 44 | 0.053  | 0.00 | 0.000 |
| 2009 | 38 | 45 | -0.260 | 0.00 | 0.007 |
| 2009 | 38 | 46 | 0.009  | 0.03 | 0.213 |
| 2009 | 38 | 47 | -0.158 | 0.00 | 0.221 |
| 2009 | 38 | 48 | -0.105 | 0.02 | 0.215 |
| 2009 | 38 | 49 | -0.225 | 0.00 | 0.000 |
| 2009 | 38 | 50 | -0.232 | 0.00 | 0.000 |

|      |    |    |        |      |       |
|------|----|----|--------|------|-------|
| 2009 | 38 | 51 | -0.150 | 0.00 | 0.000 |
| 2009 | 38 | 52 | 0.038  | 0.00 | 0.000 |
| 2009 | 38 | 53 | -0.202 | 0.00 | 0.000 |
| 2009 | 38 | 54 | 0.151  | 0.00 | 0.000 |
| 2009 | 39 | 40 | 0.340  | 0.00 | 0.324 |
| 2009 | 39 | 41 | -0.024 | 0.04 | 0.031 |
| 2009 | 39 | 42 | 0.007  | 0.00 | 0.381 |
| 2009 | 39 | 43 | -0.061 | 0.00 | 0.059 |
| 2009 | 39 | 44 | 0.001  | 0.00 | 0.032 |
| 2009 | 39 | 45 | -0.104 | 0.06 | 0.439 |
| 2009 | 39 | 46 | -0.093 | 0.00 | 0.105 |
| 2009 | 39 | 47 | 0.271  | 0.06 | 0.114 |
| 2009 | 39 | 48 | -0.078 | 0.03 | 0.106 |
| 2009 | 39 | 49 | 0.051  | 0.00 | 0.084 |
| 2009 | 39 | 50 | 0.156  | 0.00 | 0.082 |
| 2009 | 39 | 51 | 0.007  | 0.00 | 0.000 |
| 2009 | 39 | 52 | 0.101  | 0.00 | 0.000 |
| 2009 | 39 | 53 | -0.206 | 0.00 | 0.000 |
| 2009 | 39 | 54 | 0.108  | 0.00 | 0.033 |
| 2009 | 40 | 41 | -0.106 | 0.00 | 0.031 |
| 2009 | 40 | 42 | -0.178 | 0.28 | 0.670 |
| 2009 | 40 | 43 | 0.021  | 0.00 | 0.057 |
| 2009 | 40 | 44 | 0.048  | 0.00 | 0.033 |
| 2009 | 40 | 45 | -0.359 | 0.09 | 0.615 |
| 2009 | 40 | 46 | 0.040  | 0.00 | 0.119 |
| 2009 | 40 | 47 | 0.439  | 0.00 | 0.140 |
| 2009 | 40 | 48 | 0.044  | 0.00 | 0.098 |
| 2009 | 40 | 49 | 0.091  | 0.00 | 0.144 |
| 2009 | 40 | 50 | 0.070  | 0.00 | 0.133 |
| 2009 | 40 | 51 | 0.437  | 0.00 | 0.001 |
| 2009 | 40 | 52 | 0.378  | 0.00 | 0.001 |
| 2009 | 40 | 53 | -0.149 | 0.00 | 0.000 |
| 2009 | 40 | 54 | 0.234  | 0.00 | 0.034 |
| 2009 | 41 | 42 | 0.174  | 0.00 | 0.032 |
| 2009 | 41 | 43 | -0.101 | 0.00 | 0.009 |
| 2009 | 41 | 44 | -0.181 | 0.00 | 0.001 |
| 2009 | 41 | 45 | -0.126 | 0.00 | 0.031 |
| 2009 | 41 | 46 | -0.152 | 0.00 | 0.035 |
| 2009 | 41 | 47 | -0.293 | 0.00 | 0.047 |
| 2009 | 41 | 48 | 0.379  | 0.00 | 0.034 |
| 2009 | 41 | 49 | 0.081  | 0.00 | 0.024 |
| 2009 | 41 | 50 | 0.103  | 0.00 | 0.022 |
| 2009 | 41 | 51 | -0.171 | 0.00 | 0.000 |
| 2009 | 41 | 52 | -0.202 | 0.00 | 0.000 |
| 2009 | 41 | 53 | -0.100 | 0.00 | 0.000 |
| 2009 | 41 | 54 | -0.217 | 0.00 | 0.009 |

|      |    |    |        |      |       |
|------|----|----|--------|------|-------|
| 2009 | 42 | 43 | 0.088  | 0.03 | 0.038 |
| 2009 | 42 | 44 | -0.128 | 0.00 | 0.005 |
| 2009 | 42 | 45 | -0.027 | 0.10 | 0.658 |
| 2009 | 42 | 46 | -0.219 | 0.00 | 0.156 |
| 2009 | 42 | 47 | -0.064 | 0.00 | 0.182 |
| 2009 | 42 | 48 | 0.289  | 0.00 | 0.122 |
| 2009 | 42 | 49 | 0.164  | 0.02 | 0.144 |
| 2009 | 42 | 50 | 0.089  | 0.02 | 0.136 |
| 2009 | 42 | 51 | -0.232 | 0.00 | 0.000 |
| 2009 | 42 | 52 | -0.132 | 0.00 | 0.000 |
| 2009 | 42 | 53 | 0.177  | 0.00 | 0.000 |
| 2009 | 42 | 54 | -0.206 | 0.00 | 0.033 |
| 2009 | 43 | 44 | -0.201 | 0.09 | 0.170 |
| 2009 | 43 | 45 | 0.187  | 0.00 | 0.036 |
| 2009 | 43 | 46 | -0.131 | 0.00 | 0.001 |
| 2009 | 43 | 47 | -0.036 | 0.00 | 0.002 |
| 2009 | 43 | 48 | -0.041 | 0.00 | 0.000 |
| 2009 | 43 | 49 | -0.168 | 0.00 | 0.039 |
| 2009 | 43 | 50 | -0.245 | 0.00 | 0.033 |
| 2009 | 43 | 51 | -0.145 | 0.00 | 0.044 |
| 2009 | 43 | 52 | -0.151 | 0.00 | 0.035 |
| 2009 | 43 | 53 | -0.042 | 0.00 | 0.013 |
| 2009 | 43 | 54 | -0.149 | 0.00 | 0.054 |
| 2009 | 44 | 45 | -0.045 | 0.00 | 0.005 |
| 2009 | 44 | 46 | -0.109 | 0.00 | 0.000 |
| 2009 | 44 | 47 | -0.082 | 0.00 | 0.000 |
| 2009 | 44 | 48 | 0.168  | 0.00 | 0.000 |
| 2009 | 44 | 49 | 0.097  | 0.00 | 0.118 |
| 2009 | 44 | 50 | -0.102 | 0.00 | 0.103 |
| 2009 | 44 | 51 | 0.308  | 0.00 | 0.058 |
| 2009 | 44 | 52 | 0.227  | 0.00 | 0.045 |
| 2009 | 44 | 53 | 0.046  | 0.00 | 0.021 |
| 2009 | 44 | 54 | 0.106  | 0.00 | 0.054 |
| 2009 | 45 | 46 | 0.119  | 0.00 | 0.051 |
| 2009 | 45 | 47 | -0.072 | 0.00 | 0.065 |
| 2009 | 45 | 48 | -0.002 | 0.00 | 0.036 |
| 2009 | 45 | 49 | -0.004 | 0.00 | 0.060 |
| 2009 | 45 | 50 | 0.138  | 0.00 | 0.055 |
| 2009 | 45 | 51 | 0.069  | 0.00 | 0.000 |
| 2009 | 45 | 52 | -0.527 | 0.00 | 0.000 |
| 2009 | 45 | 53 | 0.065  | 0.00 | 0.000 |
| 2009 | 45 | 54 | -0.027 | 0.01 | 0.033 |
| 2009 | 46 | 47 | 0.524  | 0.71 | 0.760 |
| 2009 | 46 | 48 | 0.335  | 0.61 | 0.740 |
| 2009 | 46 | 49 | 0.085  | 0.00 | 0.074 |
| 2009 | 46 | 50 | 0.122  | 0.00 | 0.074 |

|      |    |    |        |      |       |
|------|----|----|--------|------|-------|
| 2009 | 46 | 51 | 0.095  | 0.00 | 0.000 |
| 2009 | 46 | 52 | -0.132 | 0.00 | 0.000 |
| 2009 | 46 | 53 | 0.253  | 0.00 | 0.000 |
| 2009 | 46 | 54 | -0.167 | 0.00 | 0.001 |
| 2009 | 47 | 48 | 0.211  | 0.49 | 0.674 |
| 2009 | 47 | 49 | -0.071 | 0.00 | 0.103 |
| 2009 | 47 | 50 | 0.172  | 0.00 | 0.102 |
| 2009 | 47 | 51 | 0.098  | 0.00 | 0.000 |
| 2009 | 47 | 52 | 0.323  | 0.00 | 0.000 |
| 2009 | 47 | 53 | 0.137  | 0.00 | 0.000 |
| 2009 | 47 | 54 | 0.115  | 0.00 | 0.002 |
| 2009 | 48 | 49 | 0.197  | 0.00 | 0.054 |
| 2009 | 48 | 50 | 0.069  | 0.00 | 0.054 |
| 2009 | 48 | 51 | 0.095  | 0.00 | 0.000 |
| 2009 | 48 | 52 | 0.156  | 0.00 | 0.000 |
| 2009 | 48 | 53 | 0.249  | 0.00 | 0.000 |
| 2009 | 48 | 54 | -0.145 | 0.00 | 0.000 |
| 2009 | 49 | 50 | 0.409  | 0.80 | 0.883 |
| 2009 | 49 | 51 | -0.074 | 0.00 | 0.008 |
| 2009 | 49 | 52 | -0.043 | 0.00 | 0.007 |
| 2009 | 49 | 53 | 0.347  | 0.00 | 0.004 |
| 2009 | 49 | 54 | -0.074 | 0.00 | 0.014 |
| 2009 | 50 | 51 | -0.195 | 0.00 | 0.002 |
| 2009 | 50 | 52 | 0.043  | 0.00 | 0.002 |
| 2009 | 50 | 53 | 0.375  | 0.00 | 0.001 |
| 2009 | 50 | 54 | 0.251  | 0.00 | 0.008 |
| 2009 | 51 | 52 | 0.022  | 0.81 | 0.900 |
| 2009 | 51 | 53 | -0.144 | 0.25 | 0.763 |
| 2009 | 51 | 54 | 0.121  | 0.81 | 0.929 |
| 2009 | 52 | 53 | 0.145  | 0.32 | 0.835 |
| 2009 | 52 | 54 | 0.389  | 0.77 | 0.923 |
| 2009 | 53 | 54 | 0.034  | 0.20 | 0.786 |
